# Supplementary material for: Giant reduction of the random lasing threshold in CH3NH3PbBr3 perovskite thin films by using a patterned sapphire substrate
Source: Royal Society of Chemistry journal article supplement (doi:10.1039/c9nr00863b), 2019-01-01
Supplement: c9nr00863b1.pdf [file c9nr00863b1.pdf]

## Supplementary Information

for

### Giant reduction of random lasing threshold in $\text{CH}_3\text{NH}_3\text{PbBr}_3$ perovskite thin films by using patterned sapphire substrate

Guoen Weng,<sup>1</sup> Jiao Tian,<sup>1</sup> Shiming Chen,<sup>1</sup> Juanjuan Xue,<sup>1</sup> Jiyu Yan,<sup>1</sup> Xiaobo Hu,<sup>1</sup>  
Shaoqiang Chen,<sup>\*,1,2</sup> Ziqiang Zhu,<sup>1</sup> and Junhao Chu<sup>1,2</sup>

\*Corresponding author: sqchen@ee.ecnu.edu.cn

<sup>1</sup>Key Laboratory of Polar Materials and Devices, Ministry of Education, Department of Electronic Engineering, East China Normal University, 500 Dongchuan Road, Shanghai 200241, China

<sup>2</sup>Shanghai Institute of Intelligent Electronics & Systems, Fudan University, 220 Handan Road, Shanghai 200433, China

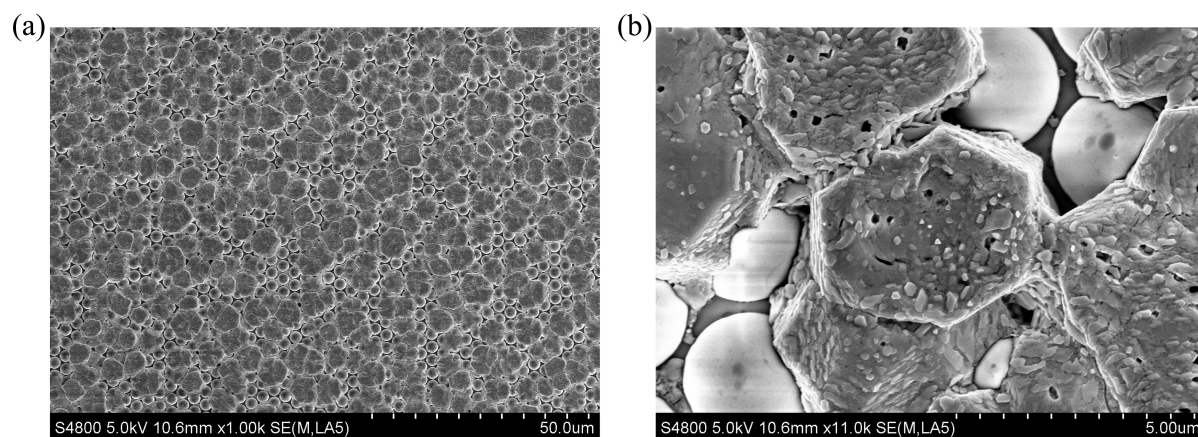

**Fig. S1** Large scale top-view SEM images of the  $\text{CH}_3\text{NH}_3\text{PbBr}_3$  perovskite thin films (a) and the corresponding expansion one (b) for the PSS samples. We can clearly see the perovskite particles or grains on the PSS. The perovskite/PSS interfaces could effectively redirect photons and thus enhance the random scattering of light in comparison to the FTO counterparts.

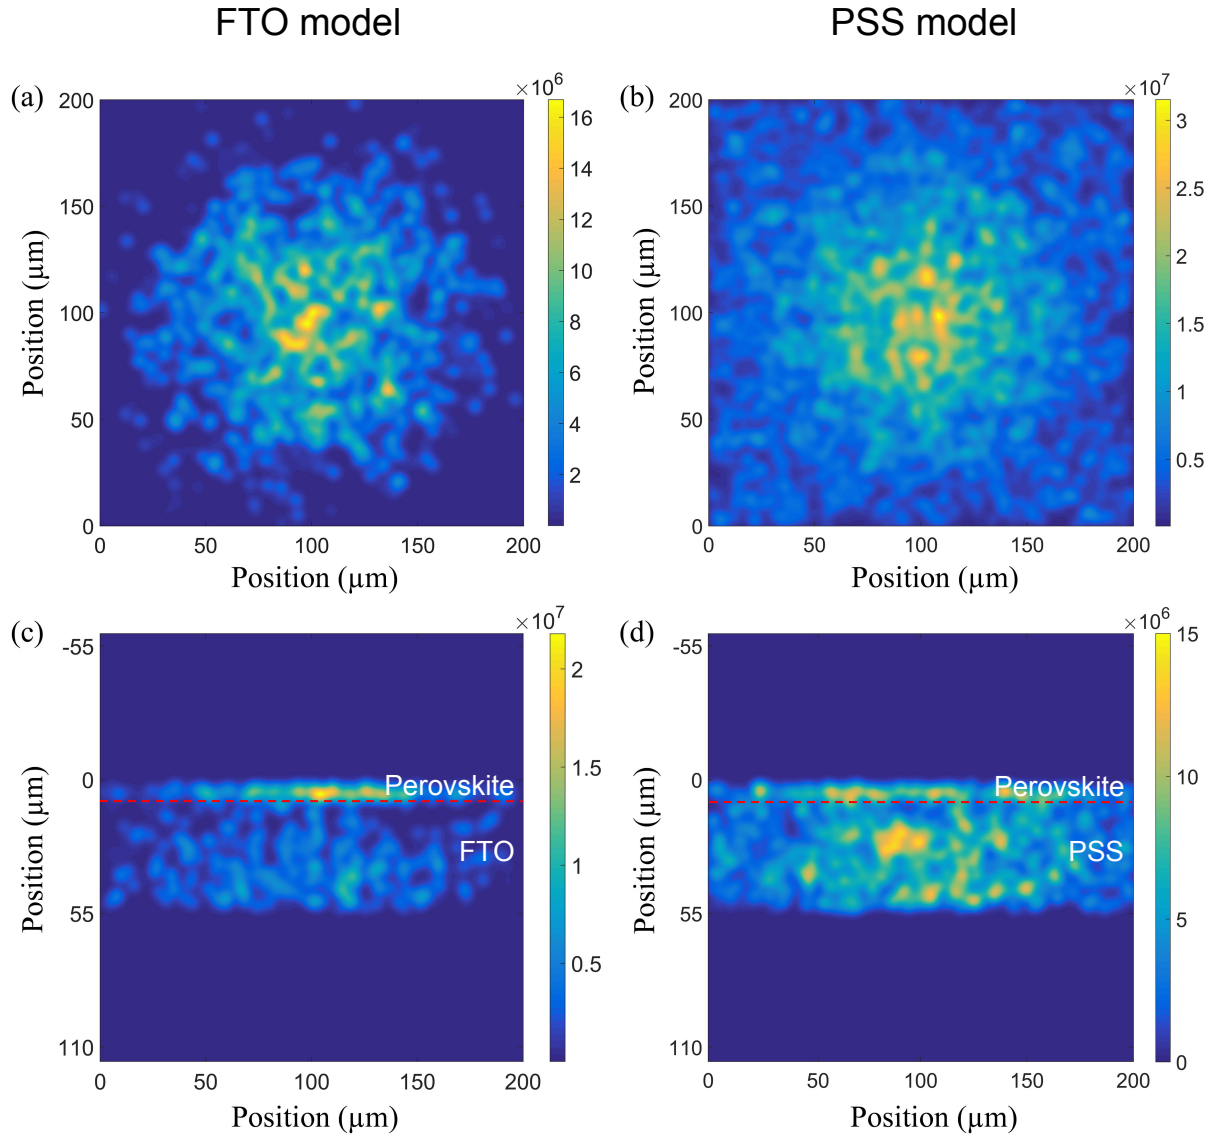

**Fig. S2** Non-normalized two-dimensional (2D) intensity distributions of the luminous flue from the bottom and side facets of the perovskite/FTO (a, c) and perovskite/PSS (b, d) structures, respectively. In both simulations, the power of the disc-shaped Lamberian source was set to be 1 W. The absolute intensities and their intensity distributions of the top, bottom and side facets were obtained. The corresponding absolute intensities are listed in Table 1 for comparison.

| Substrate | Absolute luminous flue (W) |            |        |       |
|-----------|----------------------------|------------|--------|-------|
|           | Top                        | Sides (×4) | Bottom | Total |
| FTO       | 0.110                      | 0.138      | 0.082  | 0.330 |
| PSS       | 0.281                      | 0.235      | 0.270  | 0.786 |

**Table 1** Calculated absolute emission intensities from the top, sides, and bottom facets of the perovskite/FTO and perovskite/PSS structures, respectively. It is clearly seen that the perovskite film on the PSS always presents a higher emission efficiency for all six facets due to the enhanced random scattering induced by the patterned interface.

| Substrate | LEE   |            |        |       |
|-----------|-------|------------|--------|-------|
|           | Top   | Sides (×4) | Bottom | Total |
| FTO       | 11.0% | 13.8%      | 8.2%   | 33.0% |
| PSS       | 28.1% | 23.5%      | 27.0%  | 78.6% |

**Table 2.** Calculated corresponding LEEs from the top, sides, and bottom facets of the perovskite/FTO and perovskite/PSS structures, respectively.

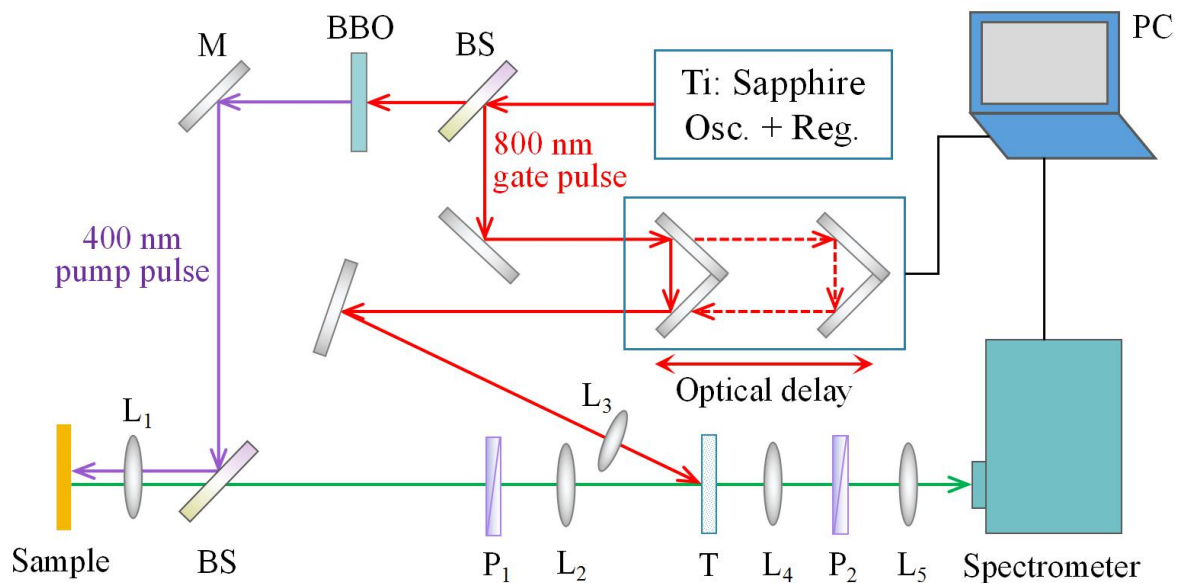

**Fig. S3** Schematic diagram of the experimental apparatus. Osc.: Ti:sapphire oscillator; Reg.: regenerative amplifier; BS: beam splitter; BBO:  $\beta$ -BaB<sub>2</sub>O<sub>4</sub> crystal; M: mirror; L: lens; P: polarizer; T: toluene solvent; PC: personal computer.

The fundamental beams (800 nm) from the regenerative amplifier were divided into two beams at a beam splitter: one is used as the excitation pulse of sample after the second harmonic generation (400 nm) at a phase-matching BBO crystal and the other as the gating laser pulse to rotate the polarization of luminescence at a Kerr medium (toluene).

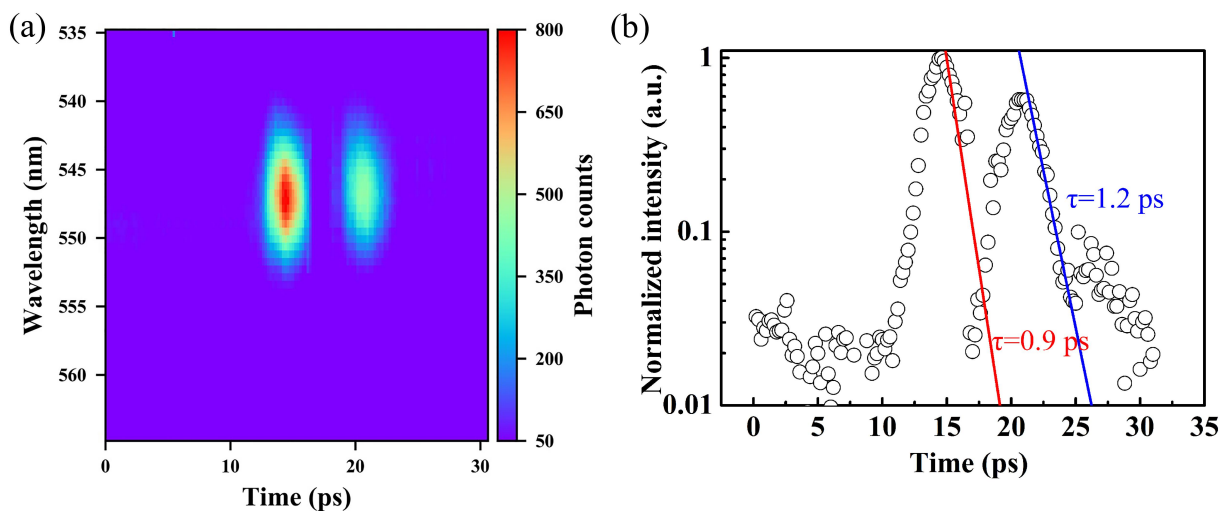

**Fig. S4** TRPL image of the RL emission from the CH<sub>3</sub>NH<sub>3</sub>PbBr<sub>3</sub> perovskite films at excitation intensity of  $2E_{th}$  for another sample (a). The corresponding spectrally-integrated waveforms of the emission pulses from the CH<sub>3</sub>NH<sub>3</sub>PbBr<sub>3</sub> films (b). The multiemission phenomenon was observed in all the PSS samples, while not for all the FTO counterparts.
